1 **Full title:** Substrate traits shape the structure of microbial community engaged in

2 metabolic division of labor

3 **Running title:** Substrate traits shape community structure

4

5 Miaoxiao Wang<sup>1,2,3,4</sup>, Xiaoli Chen<sup>1,5</sup>, Yue-Qin Tang<sup>4</sup>, Yong Nie<sup>1#</sup> and Xiao-Lei Wu<sup>1,</sup>  
6 <sup>5,6#</sup>

7

8 <sup>1</sup> College of Engineering, Peking University, Beijing 100871, China

9 <sup>2</sup> Department of Environmental Systems Science, ETH Zurich, Zurich, Switzerland

10 <sup>3</sup> Department of Environmental Microbiology, Eawag, Dübendorf, Switzerland

11 <sup>4</sup> College of Architecture and Environment, Sichuan University, Chengdu, China

12 <sup>5</sup> Institute of Ocean Research, Peking University, Beijing 100871, China

13 <sup>6</sup> Institute of Ecology, Peking University, Beijing 100871, China

14 <sup>#</sup>Corresponding author: Research Scientist, College of Engineering, Peking

15 University.

16 Tel: +86 10-62759047; Fax: +86 10-62759047; E-mail: nieyong@pku.edu.cn

17 <sup>#</sup>Corresponding author: Professor, College of Engineering, Peking University.

18 Tel: +86 10-62759047; Fax: +86 10-62759047; E-mail: xiaolei\_wu@pku.edu.cn

19

20

21

22

23



25 **Abstract**

26 Metabolic division of labor (MDOL) is widespread in nature, whereby a complex  
27 metabolic pathway is shared between different strains within a community for mutual  
28 benefit. However, little is known about how the mutual interactions in the microbial  
29 community engaged in MDOL are regulated. We hypothesized that when degradation  
30 of an organic compound is carried out via MDOL, the substrate traits (i.e.,  
31 concentration and its toxicity) modulate the benefit allocation between the two  
32 microbial populations, thus affecting the structure of this community. We tested this  
33 hypothesis by combining mathematical modelling with experiments using engineered  
34 synthetic microbial consortia. Numerous modelling analyses suggested that the  
35 proportion of the population executing the first metabolic step can be simply  
36 estimated by Monod-like formulas governed by substrate traits. The model and the  
37 proposed formula quantitatively predicted the structure of our synthetic consortia  
38 composed of two strains degrading salicylate through MDOL. Individual-based  
39 modelling and colony pattern formation assays further indicated that our rule is also  
40 applicable to estimating community structure in spatially structured environments.  
41 Our results demonstrate that the structure of the microbial communities can be  
42 quantitatively predicted from simple environmental factors, such as substrate  
43 concentration and its toxicity, which provides novel perspectives on understanding the  
44 assembly of natural communities, as well as insights into how to manage artificial  
45 microbial systems.

## 46 **Introduction**

47 In natural environments, microorganisms rarely live autonomously; instead, they  
48 interact with other individuals to form complex communities, in which they secrete a  
49 variety of toxins to compete with each other, or share metabolites to mutually benefit  
50 their survival. Among diverse modes of microbial interaction, metabolic division of  
51 labor (MDOL) is one of the most widespread phenomena, where distinct populations  
52 perform different but complementary steps of the same metabolic pathway [1-4].  
53 MDOL controls numerous ecologically and environmentally important biochemical  
54 processes. One important aspect of microbial metabolism implemented by MDOL is  
55 the degradation of a variety of complex organic compounds, including PAHs [5, 6],  
56 pesticide [7-10], plastics [11], antibiotics [12], or polysaccharides [13, 14]. Bacterial  
57 degradation of these complex substrates is usually mediated by long metabolic  
58 pathways via a number of intermediates. While these pathways often remain intact  
59 within one population, they are frequently found segregated across different members  
60 within a community in a MDOL manner. Typical examples include syringate  
61 degradation via sequential cross-feeding between *Acetobacterium woodii* and  
62 *Pelobacter acidigallici* [5], phenanthrene degradation between *Marinobacter* sp. N4  
63 and other PAH-degrading microbes in marine environments [6], as well as atrazine  
64 degradation through MDOL within four bacterial species [9]. However, little is known  
65 about how microbial communities engaged in MDOL are regulated [15].  
66 The substrate whose concentration spatially and temporally fluctuates in the marine  
67 [16], soil [17] and wastewater [18] environments, acts as one of the most important

68 conditions that govern the performance of the microbial communities [19-21]. Firstly,  
69 the concentration of substrates regulates the growth of microbial populations  
70 according to the Monod equation [22]. Secondly, many substrates such as PAHs [23,  
71 24], pesticide [7-10], and antibiotics [12], are toxic to bacterial cells, inhibiting their  
72 growth. Increasing substrate concentration enhances resource availability of a  
73 population that benefit its growth, but also potentially increases the toxic effects of  
74 substrate that harms its growth (e.g., growth kinetics may follow the equations  
75 integrated with toxic terms [25]). Thus, concentration and toxicity of substrate  
76 profoundly affect the fitness of its microbial degraders [24, 26, 27]. However, it still  
77 remains ill-defined how substrate traits affect the relative fitness of different strains  
78 involved in a community, and thus govern the structure of the community. As  
79 structure of a community is fundamental to determine its functioning [28, 29],  
80 revealing this question is fundamental for managing such microbial systems for the  
81 removal of serious pollutants.

82 Distinct from the pure culture, the effects of substrate on different populations  
83 involved in a MDOL community may vary quite a lot. Firstly, asymmetric benefit  
84 allocation exists between different populations in the MDOL community. In MDOL  
85 communities that degrade organic compounds, only the population performing the last  
86 steps can produce the growth resources (such as small organic acids) that support the  
87 bacterial growth (Supplementary Figure 1). Therefore, the population performing the  
88 last steps can preferentially acquire and privatize these nutrients (which we henceforth  
89 call *product privatization*), thus acquiring the greater benefit, while the other members

90 have to collect nutrients leaked from this population (Figure 1; left of the first row).  
91 This uneven allocation of limited resources generally benefits the population that  
92 executes the last steps (we henceforth named this population the ‘Embezzler’,  
93 analogous to a human worker responsible for the final step of an assembly line, who  
94 pockets the final product and fails to share profits with other workers). This  
95 phenomenon has been observed in many recent studies [7, 10, 30]. Increasing  
96 substrate concentration would enhance the flux of metabolites [31, 32]. Because the  
97 Embezzler only have a limited capacity of consuming the final product, increased  
98 metabolic flux causes more product released from the Embezzler cells, in turn  
99 facilitating the growth of the other population (Figure 1; Right of the first row).  
100 Secondly, substrate toxicity exerts different influences on different members. The  
101 population performing the first step transforms the toxic substrate to the intermediates  
102 (we named it the ‘Detoxifier’ henceforth), which helps it possess a lower intracellular  
103 concentration of the toxic substrate (Figure 1; The second row), resulted in that the  
104 toxic substrate is less harmful to the Detoxifier than to Embezzler. Accordingly,  
105 Detoxifier is favored when the substrate is toxic.  
106 It is important to reveal the effects of substrate concentration and toxicity on the  
107 structure of the MDOL community. To test the above two hypotheses and reveal how  
108 substrate traits shape the structure of microbial community engaged in MDOL, in this  
109 study, we combined mathematical modelling and experimentation using a synthetic  
110 microbial community. We also tested whether these effects are different when the  
111 community grows in spatially well-mixed and structured environments.



## 113 **Results**

### 114 **Testing of our hypotheses in a well-mixed system**

#### 115 *An ODE model for modelling the dynamics of a community engaged in MDOL*

116 To test our hypotheses on the effects of substrate concentration and its toxicity, we  
117 built a mathematical model to simulate the dynamics of a community engaged in  
118 metabolic division of labor (MDOL) in a well-mixed system. The dimensionless form  
119 of this model is composed of 11 ordinary differential equations (ODEs; Eqn. [4] - Eqn.  
120 [13] in Methods). As summarized in Figure 2A, we considered the degradation of an  
121 organic substrate (S) into an intermediate metabolite (I), before being degraded to the  
122 final product (P). We assumed that two strains carry out this pathway via MDOL, with  
123 the first strain only executing the first step, and the second only executing the second.  
124 Initially, only S was supplied and the initial concentration was parameterized by  $s_0$   
125 (nondimensional). Importantly, based on our hypothesis of ‘Embezzler behavior’, we  
126 assumed that, P, which is synthesized by the second strain, is the sole available  
127 resource for the growth of both strains. As a result, the second strain possesses the  
128 advantage of preferentially acquiring the resource, while the first strain only obtains  
129 those growth-limiting resource that is leaked from the second strain. Therefore, the  
130 second strain behaves as an ‘Embezzler’. Moreover, biotoxicity of the substrate was  
131 imposed (Supplementary Table 3;[25]) to the growth function, and the toxic strength  
132 was mediated by parameter  $\theta$ . Thus, for the scenarios where substrate is assumed to  
133 be toxic, the strain executing the first step behaves as a ‘Detoxifier’. Details about the  
134 model are described in Supplementary Information S1.



135 *Analysis of the ODE model indicates initial substrate concentration affects the*  
136 *structure of a MDOL community.*

137 To test our first hypothesis stating that substrate concentration affects the structure of  
138 the community, we analyzed our ODE model omitting substrate toxicity (Figure 2A).  
139 As the dimensionless model contains 11 independent parameters (Supplementary  
140 Table 4) that may affect the structure of the community, we performed a first round of  
141 numerical simulations using 885,735 parameter sets considering realistic value ranges  
142 of all the parameters (Supplementary Information S1.3; Supplementary Table 4). Our  
143 analysis showed that the Embezzler population dominated the steady-state community  
144 in all these simulations (Supplementary Figure 2; no toxic scenarios, i.e., steady-state  
145 frequencies of Detoxifier are lower than 0.5), which was in agreement with our basic  
146 assumption of product privatization. Multivariate regression analyses further  
147 suggested that six key parameters played vital roles in shaping the structure of MDOL  
148 community (Supplementary Table 4; Supplementary Figure 3A;  $p < 0.01$  and the  
149 fitting coefficient values over 0.01). Notably,  $s_0$  was second most important  
150 according to the absolute value of the fitting coefficient.  $s_0$  positively correlated with  
151 the steady-state proportion of the Detoxifier population, suggesting that a higher  
152 initial substrate concentration favors the Detoxifier, consistent with our first  
153 hypothesis.

154 Through the second round of simulations (Supplementary Information S1.3), We  
155 found that when all other five key parameters were kept constant, the steady-state  
156 proportion of the Detoxifier population ( $DF$ ) increased with an increase of the initial

157 substrate concentration (Figure 2B and 2C), and can be estimated by a Monod-like  
158 formula using  $s_0$  as the function argument (Figure 2C),

$$159 \quad DF = \frac{Fd_{max}s_0}{ks+s_0} \quad [1]$$

160 Here,  $Fd_{max}$  represents the maximum proportion of the Detoxifier populations when  
161 substrate is non-toxic;  $ks$  represents the half-saturation constant. Our analysis  
162 indicated that the simulation results of all tested parameter sets can be accurately  
163 fitted to Eqn. [1] (Figure 2D, values of Adjusted  $R^2$  mostly over 0.95), although the  
164 best fitting of  $Fd_{max}$  and  $ks$  were affected by the values of other five key parameters  
165 (Figure 2E and 2F; Supplementary Information S1.3; Supplementary Table 5;  
166 Supplementary Figure 4-5). Together, these results suggest that, in the absence of  
167 substrate toxicity, the proportion of the Detoxifier population increases nonlinearly  
168 with the increase of the initial substrate concentration, and maintains a maximum  
169 value.

170 To investigate why substrate concentration governs the structure of a community, we  
171 next analyzed the intracellular and extracellular concentration of final product of the  
172 two populations. We found that with the increase of initial substrate concentration, the  
173 fraction of final product released by the Embezzler population increased  
174 (Supplementary Figure 6A-H; Supplementary Figure 6I, Red dots). As a consequence,  
175 the Detoxifier obtained more product from the environment, resulting in a higher  
176 intracellular product concentration, gradually approaching that of the Embezzler.  
177 Moreover, based on the first hypothesis, the intracellular product concentration of the  
178 Detoxifier should never exceed that of the Embezzler, even if the substrate

179 concentration was elevated to high levels. This prediction was confirmed by our  
180 analyses (Supplementary Figure 6A-H; Supplementary Figure 6I, blue dots). As a  
181 result, Embezzler cells still maintained their advantage from privatizing final product.  
182 This result suggests that in the absence of substrate toxicity, the benefit from product  
183 privatization obtained by the Embezzler population cannot be completely eliminated  
184 by simply increasing the substrate concentration. This observation matched with our  
185 result that the maximum proportion of the Detoxifier population ( $Fd_{max}$ ) never  
186 exceeded 0.5 (Figure 2F; Supplementary Figure 5). In summary, these results suggest  
187 that substrate concentration affects the structure of the community engaged in MDOL  
188 by affecting the amount of the final product released by Embezzler (Figure 1; the first  
189 row).

190 *Analysis of the ODE model indicates that substrate toxicity affects the structure of a*  
191 *MDOL community.*

192 To test our second hypothesis, we next employed an ODE model that included the  
193 parameter of substrate toxicity (Figure 3A). Applying similar simulation and analysis  
194 method as used in the above section (Supplementary Information S1.3), we found that  
195 the toxic strength ( $\theta$ ) of substrate also played a significant role in structure the MDOL  
196 community.  $\theta$  exhibited a significantly positive relationship with the final proportion  
197 of the Detoxifier population (Figure 3B; Supplementary Figure 2-3; Supplementary  
198 Table 4), in agreement with our second hypothesis. We then upgraded Eqn. [1] to  
199 collectively consider the effects of substrate concentration and its toxicity (Figure 3C),  
200 as follow

201 
$$DF = \frac{Fd_{max}s_0}{ks+s_0} \cdot \left(1 + \frac{Ts_{max}\theta s_0}{kt+\theta s_0}\right) \quad [2]$$

202 In Eqn. [2], we use term  $1 + \frac{Ts_{max}\theta s_0}{kt+\theta s_0}$  to describe the effect of substrate toxicity on the  
203 proportion of the Detoxifier populations.  $Ts_{max}$  represents the maximum fold increase  
204 of Detoxifier proportion benefiting from the substrate toxicity;  $ks$  represents the  
205 half-saturation constant of this toxic effect. This term is positively affected by the  
206 toxic strength ( $\theta$ ) and substrate concentration ( $s_0$ ), since increasing either toxic  
207 strength or substrate concentration harms population growth (see Eqn. [12]-[13] in  
208 Methods and Supplementary Table 3). Our analyses further indicated that the  $DF$   
209 values derived from numerical simulations accurately fitted to the values predicted by  
210 Eqn. [2] (Figure 3D; values of Adjusted  $R^2$  mostly over 0.90; see Supplementary  
211 Table 5, and Supplementary Figure 7-10 for parameter sensitive analyses). These  
212 results suggest that when substrate toxicity was taken into account, the proportion of  
213 the Detoxifier population increased with both the initial concentration and the toxic  
214 strength of the substrate.

215 To address why substrate toxicity affects structure of the community, we next  
216 analyzed the intracellular and extracellular concentration of both S and P of the two  
217 populations. As shown in Supplementary Figure 11, the fraction of final product  
218 released by the Embezzler population largely agrees with the result derived from  
219 those non-toxic scenarios, suggesting that the presence of substrate toxicity does not  
220 change the leakiness of final product from the Embezzler. Our analysis of the S  
221 concentration showed that the Detoxifier population generally maintained a lower  
222 intracellular concentration level of S than that of the Embezzler (Supplementary

223 Figure 12), due to its conversion of S, thus possessing a growth advantage over the  
224 Embezzler population. Based on this mechanism, higher speed of the first reaction, or  
225 lower S transport rate, appears to favor the Detoxifier population since these two  
226 conditions assist Detoxifier in maintaining a lower intracellular S concentration.  
227 Consistent with this corollary,  $Ts_{max}$  was significantly positively correlated with  $a_I$   
228 and significantly negatively correlated with  $\gamma_s$  (Supplementary Table 5;  
229 Supplementary Figure 10). Overall, these results indicated that the difference in  
230 intracellular concentration of substrate is the main reason why substrate toxicity  
231 favors the Detoxifier population (Figure 1; second row).

232 When we assessed the community structure at different conditions of substrate traits,  
233 we found that Detoxifier population dominated the community when the substrate  
234 concentration and substrate toxicity were sufficiently high (its relative proportion  
235 exceeded 50% of the community; Figure 3C; Supplementary Figure 2), suggesting  
236 that the benefit from product privatization of the Embezzler can be neutralized by  
237 higher substrate concentration and toxicity. This phenomenon is quantitatively  
238 characterized by Eqn. [2]: the maximum Detoxifier proportion ( $Fd_{max}$ ) never exceed  
239 0.5 in the absence of substrate toxicity (Supplementary Figure 8), but substrate  
240 toxicity can assist Detoxifier in breaking through this constraint, as quantified by the  
241 term  $1 + \frac{Ts_{max} \cdot \theta s_0}{kt + \theta s_0}$ .

242 In summary, our simulations clearly showed that when a compound degradation  
243 pathway is executed through MDOL in a community, both increasing substrate  
244 concentration and toxicity of the substrate favor the Detoxifier population, resulting in

245 substrate traits to shape the structure of the community.

246 *Experimental evaluation of our rule using a liquid culture of a synthetic microbial*

247 *consortium engaged in MDOL*

248 To experimentally test the prediction from our ODE model, we engineered a synthetic

249 consortium composed of two *P. stutzeri* strains, which cooperatively degrade an

250 organic compound, salicylate, via MDOL (Figure 4A). In this synthetic consortium,

251 strain *P. stutzeri* AN0010 only retained its ability to convert toxic substrate, salicylate

252 to the intermediate catechol [33], behaving as the ‘Detoxifier’; the second strain, *P.*

253 *stutzeri* AN0001, was only able to metabolize catechol, but possessed the preferential

254 access to the final product, i.e., pyruvate and acetyl-CoA (Figure 4A), the direct

255 carbon source of both strains, thus behaving as the ‘Embezzler’. Details about the

256 strain construction are described in Supplementary Information S3. For simplicity, we

257 henceforth refer to our community as ‘SMC-mdol’.

258 We first derived a function to predict the structure of our synthetic consortium based

259 on our model using experimentally measured or previously reported parameters

260 (Figure 4B; Supplementary Table 6; Supplementary Information S1.3). We quantified

261 the toxicity of salicylate (see Supplementary Information S3.4 for measurement

262 details), and the measured dimensionless value of toxic strength ( $\theta$ ) of salicylate was

263 0.0032 (Supplementary Figure 13). Accordingly, we mathematically predicted the

264 effects of substrate traits on the structure of SMC-mdol, as indicated by the red line in

265 Figure 4B and 4C. In the liquid minimal medium supplemented with different

266 concentrations of salicylate, SMC-mdol exhibited similar dynamics to that from our

267 corresponding ODE simulations (Supplementary Figure 14). The steady-state  
268 proportion of Detoxifier population increased from  $25.6\% \pm 2.5\%$  to  $61.1\% \pm 2.6\%$  as  
269 a function of initial salicylate concentration (Figure 4C). Moreover, our prediction  
270 function accurately estimated the steady-state structure of SMC-mdol, with a  
271 predictive power (Adjusted  $R^2$ ) of 0.983. Importantly, when the substrate  
272 concentration reached high levels, the Detoxifier population dominated the  
273 community (i.e., its relative fraction over 50 %), suggesting that substrate toxicity  
274 considerably affected the structure of our consortium. Together, these experiments  
275 confirmed our simple rule proposed from mathematical modelling, and suggested that  
276 the structure of microbial community engaged in MDOL are governed by  
277 concentration and toxicity of the substrate.

### 278 **Testing our hypotheses in spatially structured environments**

279 In the above modeling and experiments, we investigated how substrate traits affect the  
280 structure of a MDOL community, principally by assuming that the substances and  
281 cells were well-mixed in the system. However, microorganisms frequently grow in  
282 spatially structured environments [34-36]. Previous studies reported that different  
283 physical characteristics between the well-mixed and spatially structured systems  
284 significantly affected the structure of a community [37-40]. Therefore, we set out to  
285 test whether our rule derived from the assumption of a well-mixed system can be  
286 expanded to estimate the structure of a MDOL community in spatially structured  
287 environments.

288 *Individual-based modelling of the dynamics of a MDOL community.*

289 To develop a mathematical framework to simulate the dynamics of MDOL  
290 community in spatially structured environment, we built an individual-based (IB)  
291 model. The basic configuration of our IB model was identical to the framework of our  
292 ODE model. Moreover, we assumed that the diffusion of S, I, and P was limited in the  
293 IB model, and mediated by their diffusion coefficients ( $D_s$ ,  $D_i$ , and  $D_p$ ). Details  
294 about the IB model are described in Supplementary Information S2.

295 To test our hypotheses, we ran the IB model using the parameters consistent with our  
296 experimental system (Supplementary Table 7), but varied the toxic strength ( $\theta$ ) and  
297 initial concentration of the substrate ( $s_0$ ). We found that during the colony growth, cell  
298 lineages of Detoxifier and Embezzler segregated at frontiers, forming adjacent red and  
299 green cell sectors (Figure 5A; Supplementary video 1-4). Analysis of the spatial  
300 distribution of S, I, and P suggested that the development of this colony characteristic  
301 was mainly attributed to the ‘active layer effect’ reported previously [41]. As S is  
302 generally supplied from the outside of the colony, a thin active cell layer formed  
303 depending on the penetration of S, I and P (Supplementary video 1-4). Consequently,  
304 community structures in the inoculating and expanding regions may differ.

305 Accordingly, we separately analyzed the structures in the inoculating region and  
306 expanding region of the colonies (Supplementary Figure 15). We found that with the  
307 growth of colony, community structures in the inoculating region changed little, while  
308 the community structures in the expanding region shifted over time, gradually  
309 approaching a steady-state (Supplementary Figure 16). Therefore, we next  
310 investigated how substrate traits affect the steady-state structures of the MDOL



311 community in the expanding regions. the community structure in the expanding  
312 region was significantly affected by substrate traits, and can be well estimated by the  
313 rule (Eqn. [2]) that we proposed for a well-mixed system (Figure 5B; Supplementary  
314 Figure 17). This result indicated that the structure of the MDOL community in  
315 spatially structured environments can also be estimated by the proposed simple  
316 formula governed by substrate traits.

317 We also found that increasing substrate concentration assisted Detoxifier to obtain  
318 more product from the environment, thus retaining higher intracellular product  
319 concentrations (Supplementary Figure 18). Furthermore, Detoxifier cells possessed a  
320 lower intracellular concentration level of S than that of the Embezzler cells in our IB  
321 simulations (Supplementary Figure 19); higher speed of the first reaction, or lower S  
322 transport rate, also significantly increased the maximum benefit ( $Ts_{max}$ ) that  
323 Detoxifier cells can obtained from substrate toxicity (Supplementary Figure 20;  
324 correlation analysis  $p < 0.0001$ ), same as our results from ODE modelling. Therefore,  
325 same mechanisms as in the well-mixed system are also applicable to explain why  
326 substrate traits affects the structure of MDOL community in spatially structured  
327 environments.

328 *Experimental evaluation of our rule by culturing our synthetic microbial consortium*  
329 *in spatially structured environment.*

330 We next experimentally tested our hypotheses in spatially structured environments.  
331 Several studies have reported that type IV pilus may affected the microbial colony  
332 patterns [42-44]. To directly focus on the effects of substrate traits and avoid the

333 effects of pili, we deleted the *pilA* and *pilB* genes of the both strains involved in our  
334 synthetic consortium. This design follows other studies that performed patterning  
335 experiments using non-motile strains [45-48]. The derived consortium was named as  
336 SMC-mdol $\Delta$ *pilAB*. As shown in Fig. 4C, this strain modification did not change the  
337 effects of substrate traits on the structures of the consortium in well-mixed system, as  
338 well as the salicylate toxicity to the strains (Supplementary Figure 13).

339 To test our hypotheses, we cultured SMC-mdol $\Delta$ *pilAB* on an agarose surface to which  
340 salicylate was added at different concentrations. The experimentally observed colony  
341 patterns were very similar to those observed in the simulations (Figure 5C). We next  
342 separately assessed the structures of the consortium in both the inoculating region and  
343 expanding region of the colonies. We found that the proportion of Detoxifier  
344 population slightly shifted from  $40.9\% \pm 3.5\%$  to  $60.0\% \pm 6.0\%$  in the inoculating  
345 region (Supplementary Figure 21), but it largely varied from  $17.4\% \pm 1.5\%$  to  $69.0\%$   
346  $\pm 7.0\%$  in the expanding region (Figure 5D). Importantly, the experimental results of  
347 expanding region accurately fitted to our derived prediction function (Figure 5D) with  
348 a predicting power (Adjusted  $R^2$ ) of 0.982. Together, our simulations and experiments  
349 demonstrated that our rules on how substrate traits shape the structure of MDOL  
350 community were applicable when this community grew in a spatially structured  
351 environment.

### 352 *The effects of substance diffusivity on the structure of the MDOL community*

353 Although the structure of MDOL community in spatially structured and well-mixed  
354 environments can both be estimated by Eqn. [2], the estimated parameter values in the

355 prediction functions derived from ODE and IB model are slightly different (Figure 4  
356 and 5), even if we applied identical parameters and equations in these two models  
357 (Supplementary Information S2.3). Through mathematical modelling, we revealed  
358 that limited mass diffusion is one of the major reasons that lead to this difference (see  
359 Supplementary Information 2.2 for detail). Our analyses suggested that higher level of  
360 P diffusion favors the Detoxifier (Supplementary Figure 22-23), whereas increasing  
361 the diffusion level of I harms the Detoxifier (Supplementary Figure 24-25).  
362 In addition, we found that the diffusion level of substrate has two opposing effects on  
363 the structure of MDOL community. On the one hand, higher diffusion level of S  
364 benefits Detoxifier (Figure 6A, first row), through thickening the cell's 'active layer'  
365 (Figure 6B; [48]), and thus increasing production and secretion of the final product by  
366 Embezzler cells. On the other hand, higher diffusion level of S also decreases the  
367 fitness of the Detoxifier cells by modifying the concentration gradient of S around the  
368 two types of cells, and thus changing relative toxic level of S (Figure 6A, second row;  
369 Supplementary Figure 26). Combining these two effects, we formulated a new  
370 formula to estimate the structure of MDOL community

$$371 \quad DF = \frac{Fd_{max}s_0}{ks+s_0} \cdot \left(1 + \frac{Ts_{max}\theta s_0}{kt+\theta s_0}\right) \cdot \left(\frac{s_0 D_s}{kd_1+s_0 D_s} - \frac{\theta D_s}{kd_2+\theta D_s}\right) \quad [3]$$

372 In this formula,  $\frac{s_0 D_s}{kd_1+s_0 D_s}$  represents an estimate of the positive effect of increasing  
373 substrate diffusion level via thickening cell 'active layer', related to the initial  
374 substrate concentration ( $s_0$ ; Figure 6B; [48]);  $\frac{\theta D_s}{kd_2+\theta D_s}$  represents an estimate of the  
375 negative effect of increasing substrate diffusion level, influenced by toxic strength of  
376 the substrate (Figure 6A; the second row). Eqn. [3] accurately estimated the structure

377 of MDOL community in our IB simulations (Figure 6C;  $R^2=0.994$ ). Overall, we

378 concluded that the traits of substrate, including concentration, toxicity, and diffusivity,

379 are fundamental to shaping the structure of MDOL community.

380

381 **Discussion**

382 Here we show how substrate traits shape the structure of the microbial communities  
383 engaged in metabolic division of labor (MDOL) when degrading organic compounds.

384 The population performing the first step is favored by both higher substrate  
385 concentration and its toxicity. This rule is applicable when the community grow both  
386 in a well-mixed and a spatially structured environment.

387 Recently, numerous studies have explored the strategy of dividing metabolic roles  
388 across different populations in a consortium toward removal of organic pollutants [8,  
389 49-53]. Our proposed rule may be expanded to forecast the structure of these  
390 consortia. For instance, one recent study reported that a bacterial consortium  
391 composed of *Leucobacter* sp. GP and *Achromobacter denitrificans* PR1 efficiently  
392 degrades an antibiotic, sulfamethoxazole, in which the strain GP is responsible for the  
393 initial metabolism of the sulfamethoxazole (Detoxifier), and the strain PR1 carries out  
394 the subsequent conversion (Embezzler)[12]. This study measured the structures of the  
395 community across a gradient of initial substrate concentrations, and found that the  
396 proportion of the GP is positively correlated with the initial sulfamethoxazole  
397 concentration. This observation largely agrees with the idea derived from our model  
398 and experiments. The prediction on the structure of community may largely help to  
399 manage these communities for better performance [15, 28, 29].

400 Our study also indicated that limited mass diffusion in spatially structured  
401 environments is one key factor to determine the structure of a community. This  
402 finding is reminiscent of recent studies proposing that limited mass diffusion plays

403 significant role on the structure of the communities engaged in other diffusion-based  
404 interaction modes, including syntrophic exchange [37, 40, 54], cross-protection [55],  
405 and ‘rock-paper-scissors’ interaction [56, 57]. One important hypothesis from these  
406 studies is that limited mass diffusion is one possible way to privatize public benefit  
407 [37, 40, 58]. We found this hypothesis is also applicable to explain the structuring of  
408 the community engaged in MDOL. On the one hand, limited mass diffusion helps the  
409 Embezzler population to privatize the final product for its own growth. On the other  
410 hand, it helps the Detoxifier population to privatize its benefit from detoxification.  
411 Therefore, limited mass diffusion may be a universally used avenue for  
412 microorganisms to maintain their private benefit in spatially structured environments.  
413 In our IB modelling, we also found that specific spatial patterns developed by the  
414 MDOL community. In agreement with previous studies [39, 59, 60], when two  
415 populations engaged in MDOL, cells from the two populations are spatially more  
416 proximal to each other than the scenario when the two populations did not exhibit  
417 defined interactions (Supplementary Figure 27). In addition, we also found that the  
418 level of spatial proximity was governed by substrate traits (Supplementary Figure 27).  
419 Interestingly, when the strength of substrate toxicity was higher, the Detoxifier cells  
420 occupied the periphery of the growing colony, forming a clearly ‘ring’ around the  
421 colony (Figure 5; Supplementary video 3; Supplementary Figure 28). The formation  
422 of this ring might be due to the fact that the substrate was present at higher  
423 concentrations at the colony edge, and hence more toxic, thus largely favoring  
424 Detoxifier cells at edge. These results suggest that substrate traits also govern the

425 spatial distributions of different cells in the colony developed by MDOL community,  
426 which may in turn, affect the structure of such community. Although we did not  
427 observe this featured cell distribution in our experiments, one recent study found that  
428 a MDOL community that degrades toluene developed a similar ‘ring’-shape pattern as  
429 observed in our IB model [59]. Therefore, such cell distribution may represent a  
430 critical feature of the spatial patterns developed by a MDOL community that degrades  
431 toxic substrates.

432 While our study provides critical new insights into how the community engaged in  
433 MDOL assembles, a number of limitations need to be taken into consideration. First,  
434 our model analysis showed that substrate toxicity is vital to determine the structure of  
435 communities engaged in MDOL. However, due to the difficulties in manipulating the  
436 toxicity of the substrate (salicylate) *in vitro*, we were unable to experimentally  
437 compare the impact of the different toxic strengths on the structure of our community.  
438 Nevertheless, our model correctly predicts that simply increasing the initial substrate  
439 concentration is unlikely to shape a community dominated by the Detoxifier  
440 population, while the presence of substrate toxicity renders the ‘Detoxifier’ population  
441 in the community to become dominant. Therefore, the observation that Detoxifier  
442 population was able to dominate the synthetic consortium when supplying high  
443 concentration of salicylate, and the measured biotoxicity of salicylate strongly  
444 suggested that substrate toxicity should affect the structure of our synthetic microbial  
445 consortium. In agreement with this idea, our prediction functions involved in  
446 salicylate toxic strength fits the experiment results very well. To further examine this

447 idea, it is necessary to design a better system in which the toxicity of the substrate can  
448 be modulated.

449 Second, our ODE model suggests that apart from substrate traits, five other key  
450 parameters exist that exhibit considerable effects on the structure of a MDOL  
451 community. Here, we primarily focused on the effects of substrate traits, without  
452 analyzing in detail how all the seven key factors collectively determine the structure  
453 of community. Nonetheless, our analysis presented here suggests that biotic factors  
454 such as speed of the first reaction ( $a_1$ ), mass transport rate ( $\gamma_s, \gamma_i, \gamma_p$ ), as well as  
455 consumption rate of P ( $C_p$ ), affected the structure of the community, namely by  
456 determining the value of parameters in Eqn. [2] (i.e.,  $Fd_{max}$ ,  $ks$ ,  $Ts_{max}$ , and  $kt$ ).  
457 However, due to the difficulties in analytically solving non-linear ODEs, as well as  
458 the low efficiency of individual-based simulations [61], detailed quantitative  
459 understanding of how all these factors affect the structure of MDOL community  
460 remains limited. Further studies may use more simplified models that combine these  
461 elements to provide a more general description of the principles governing the  
462 structuring of a MDOL community.

463 To engineer stable and high-efficient microbial systems for bioproduction or  
464 biodegradation, it will be critical to predict how the communities assembled by a  
465 given set of strains exhibiting modularized functions. Our results demonstrate that, for  
466 a given community engaged in MDOL, its structure can be quantitatively estimated  
467 from the abiotic factors, such as the traits of its substrate, suggesting that it is feasible  
468 to manage microbial communities through manipulation of specific environmental



469 factors, to address grand challenges facing human society in agriculture, degradation

470 of the environment, and human health.

471

## 472 **Methods**

### 473 **Formulation and analyses of the ODE model**

#### 474 *Formulation of the ODE model*

475 To simulate the dynamics of a MDOL community in well-mixed system, a  
476 mathematical model was formulated using ordinary differential equations (ODEs).  
477 Here, the dimensionless forms of the models were presented. The detailed derivations  
478 of the models, and choices of parameter values are described in Supplementary  
479 Information S1.

480 As described in the Results section, a two-step pathway was assumed to be  
481 implemented by MDOL between two populations (Figure 2A and Figure 3A). For  
482 simplicity, the basic model was built based on five simple assumptions: (1) The  
483 systems are well mixed in each compartment (inside a cell or in the extracellular  
484 space). (2) transport of substrate (S), intermediate (I) and final product (P) is mediated  
485 by passive diffusion; (3) P was assumed to be the sole and limited resource for the  
486 growth of the two populations and its consumption was calculated following Monod  
487 equations; (4) Basic biological properties (the coefficients in Monod equations)  
488 regarding the growth of the two populations are identical, since we only focused on  
489 the effects of abiotic factors; (5) when applicable, substrate toxicity was introduced by  
490 adding three different toxic terms to the growth equation (Supplementary Table 3),  
491 dependent on intracellular S concentration of the corresponding population. The  
492 dynamics of intracellular and extracellular I and P are given by

$$493 \quad \frac{ds_{l,in}}{dt} = -\frac{a_I}{1+s_{l,in}} s_{l,in} + \gamma_s \cdot (s_{out} - s_{l,in}) \quad [4]$$

$$494 \quad \frac{ds_{2,in}}{dt} = \gamma_s \cdot (s_{out} - s_{2,in}) \quad [5]$$

$$495 \quad \frac{di_{1,in}}{dt} = \frac{a_1}{1+s_{1,in}} s_{1,in} - \gamma_i \cdot (i_{1,in} - i_{out}) \quad [6]$$

$$496 \quad \frac{di_{2,in}}{dt} = -\frac{a_2}{\beta_2+i_{2,in}} i_{2,in} + \gamma_i \cdot (i_{out} - i_{2,in}) \quad [7]$$

$$497 \quad \frac{dp_{1,in}}{dt} = -\frac{Cp}{\beta_g+p_{1,in}} p_{1,in} + \gamma_p \cdot (p_{out} - p_{1,in}) \quad [8]$$

$$498 \quad \frac{dp_{2,in}}{dt} = \frac{a_2}{\beta_2+i_{2,in}} i_{2,in} - \frac{Cp}{\beta_g+p_{2,in}} p_{2,in} + \gamma_p \cdot (p_{out} - p_{2,in}) \quad [9]$$

$$499 \quad \frac{ds_{out}}{dt} = -x_1 \cdot \gamma_s \cdot (s_{out} - s_{1,in}) - x_2 \cdot \gamma_s \cdot (s_{out} - s_{2,in}) \quad [10]$$

$$500 \quad \frac{di_{out}}{dt} = x_1 \cdot \gamma_i \cdot (i_{out} - i_{1,in}) - x_2 \cdot \gamma_i \cdot (i_{out} - i_{2,in}) \quad [11]$$

$$501 \quad \frac{dp_{out}}{dt} = x_2 \cdot \gamma_p \cdot (p_{out} - p_{1,in}) - x_1 \cdot \gamma_p \cdot (p_{out} - p_{2,in}) \quad [12]$$

502 The growth of the two populations was modeled using a general logistic function with  
503 first-order cell death:

$$504 \quad \frac{dx_1}{dt} = \frac{Cp}{bg+p_{1,in}} p_{1,in} \gamma_i x_1 \left( 1 - \frac{x_1+x_2}{\rho} \right) \quad [13]$$

$$505 \quad \frac{dx_2}{dt} = \frac{Cp}{bg+p_{2,in}} p_{2,in} \gamma_i x_2 \left( 1 - \frac{x_1+x_2}{\rho} \right) \quad [14]$$

506 The definitions and dimensionless methods of all variables are listed in  
507 Supplementary Table 1. The definitions and dimensionless methods, as well as the  
508 value ranges of all the parameters involved in these equations are listed in  
509 Supplementary Table 2.

### 510 *Simulation and analyzing protocol of the ODE model*

511 Details of the simulation and analysis protocols of our ODE model and the  
512 downstream analyses are described in Supplementary Information S1.3. Briefly, to  
513 solve the community dynamics of the MDOL community with given parameter sets,  
514 numerical simulations of our ODE model were performed using *NDsolve* function of  
515 *Wolfram Mathematica*. The numerical solutions of all the variables, including the

516 dynamics of mass (S, I, P) concentration and biomass, were recorded for further  
517 analyses. To perform simulations with numerous parameter sets, as well as the  
518 downstream analysis, custom *Mathematica* scripts were wrote mainly based on the *Do*  
519 loop function.

## 520 **Individual-based modeling**

521 Our individual based (IB) model was constructed based on *gro* platform ([https:](https://github.com/liaupm/GRO-LIA)  
522 <https://github.com/liaupm/GRO-LIA>), a simulator designed by Gutiérrez and  
523 colleagues aiming to describe multicellular bacterial behavior [62]. The model aims to  
524 simulate the growth of a microbial colony composed of two populations who execute  
525 substrate degradation via MDOL on a surface. The model was formulated mainly  
526 using the same equations as our dimensional ODE model (Supplementary Information  
527 S1.1, Eqns. [S1]-[S13]) to characterize the intra- and extracellular dynamics of mass  
528 (S, I, P) concentration, as well as to calculate the rate of cell growth. Four main  
529 differences exist between our IB model and the ODE model: (1) The IB model was  
530 formulated on a spatially structured surface, and the diffusion of S, I, and P was  
531 limited; (2) Mass dynamics was modelled at single-cell level; (3) The growth of both  
532 populations was modelled at single-cell level, and passive cell shoving during the cell  
533 growth was included; (4) cells were inoculated in the center of the surface, and the  
534 entire community underwent ‘colony range expansion’, a process whereby the  
535 community immigrate outwards as a whole, driven by the force generated from cell  
536 growth and division (Supplementary Figure 15). The mathematical framework  
537 formulating these four points is described in Supplementary Information S2.1. To

538 implement our design of the IB model, custom codes were written in *gro* language.

539 Variables and Parameters in the IB model are summarized in Supplementary Table 7.

540 Details of the IB simulation workflow are described in Supplementary Information

541 S2.

## 542 **Experimental verification of our model prediction**

### 543 *Genetic manipulation of the P. stutzeri strains*

544 All *P. stutzeri* strains were engineered from a naphthalene-degrading bacterial strain *P.*

545 *stutzeri* AN10 [63]. Genes that encode the key enzymes responsible for corresponding

546 metabolic steps in salicylate degradation pathway were knocked out to generate the *P.*

547 *stutzeri* strains. The details of the genetic manipulation of are described in

548 Supplementary information S3.

### 549 *Liquid cultivation of our synthetic microbial communities*

550 Liquid cultivation of our synthetic microbial communities was performed in 96-well

551 plates that contains 120  $\mu$ L fresh minimum medium. Proportions of the two

552 populations in the community were estimated by measuring the fluorescent intensity

553 of the two strains involved using a microplate reader (Molecular Devices, Sunnyvale,

554 America). Detailed protocols are described in Supplementary information S4.

### 555 *Colony pattern formation assays*

556 Colony pattern formation assays were performed on the agarose surface in a Petri dish

557 (60 mm in diameter). Images of the colony patterns were taken under a 5 $\times$  objective

558 using a Leica DM6000B fluorescence microscope (Leica Corporation, Wetzlar,

559 Germany) equipped with a LED fluorescence illuminator (Leica Corporation). The

560 relative fraction of each population in the colonies was measured by image analysis,  
561 as well as similar fluorescence-measurement method as performed in liquid  
562 cultivation experiments. Detailed protocols are described in Supplementary  
563 information S5.

#### 564 **Statistical analysis**

565 Unless indicated otherwise, the number of replicates was three for each simulation,  
566 and six for each experiment. For comparative statistics, unpaired, two-tailed, Student's  
567 t-test was performed in Wolfram Mathematica (version 12.4). To fit the data to the  
568 proposed function, Nonlinearmodelfit function of the Wolfram Mathematica (version  
569 12.4) was applied.

#### 570 **Code availability**

571 All custom *Mathematica* codes used for ODE simulation and data analyses, as well as  
572 the source *gro* codes used for our IB simulations are available at Github:  
573 <https://github.com/RoyWang1991/MDOLcode/tree/master/MDOL-spatial>.

#### 574 **Competing Interests**

575 The authors declare that they have no conflict of interest.

#### 576 **Acknowledgments**

577 We wish to thank Professor Ping Xu (Shanghai Jiao Tong University, Shanghai, P.R.  
578 China) for supplying plasmid pMMPc-Gm, used for fluorescence labeling in this  
579 study; Dr. Min Lin (Chinese Academy of Agricultural Sciences, Beijing, P.R. China)  
580 for providing plasmid pK18mobsacB and pRK2013, used for genetic engineering in  
581 this work; Professor Martin Ackermann (ETH Zurich, Zurich, Switzerland), Dr. David

582 Johnson (Eawag, Dübendorf, Switzerland) and Yinyin Ma (Eawag, Dübendorf,  
583 Switzerland) for constructive inputs on the design of this study; Professor Martín  
584 Gutiérrez (Universidad Politécnica de Madrid, Madrid, Spain) for his kindly guidance  
585 for the set-up of the *gro* platform for the individual-based simulations; Dr. T. Juelich  
586 (UCAS, Beijing) for linguistic assistance during the preparation of this manuscript.  
587 This work was supported by National Key R&D Program of China  
588 (2018YFA0902100 and 2018YFA0902103), and National Natural Science Foundation  
589 of China (91951204, 31761133006, 31770120, and 31770118).

590

591 **References**

- 592 1. Kreft JU, Griffin BM, Gonzalez-Cabaleiro R. Evolutionary causes and  
593 consequences of metabolic division of labour: why anaerobes do and aerobes don't.  
594 Curr Opin Biotechnol. 2020;62:80-7; doi:10.1016/j.copbio.2019.08.008.
- 595 2. Tsoi R, Wu F, Zhang C, Bewick S, Karig D, You L. Metabolic division of labor in  
596 microbial systems. Proc Natl Acad Sci U S A. 2018;115:10:2526-31;  
597 doi:10.1073/pnas.1716888115.
- 598 3. Harvey E, Heys J, Gedeon T. Quantifying the effects of the division of labor in  
599 metabolic pathways. J Theor Biol. 2014;360:222-42; doi:10.1016/j.jtbi.2014.07.011.
- 600 4. Thommes M, Wang T, Zhao Q, Paschalidis IC, Segre D. Designing Metabolic  
601 Division of Labor in Microbial Communities. mSystems. 2019;4:2;  
602 doi:10.1128/mSystems.00263-18.
- 603 5. Schink B, Pfennig N. Fermentation of Trihydroxybenzenes by  
604 *Pelobacter-Acidigallici* Gen-Nov Sp-Nov a New Strictly Anaerobic,  
605 Non-Sporeforming Bacterium. Arch Microbiol. 1982;133:3:195-201; doi:Doi  
606 10.1007/Bf00415000.
- 607 6. Wang CY, Huang Y, Zhang ZT, Hao H, Wang H. Absence of the nahG-like gene  
608 caused the syntrophic interaction between *Marinobacter* and other microbes in  
609 PAH-degrading process. J Hazard Mater. 2020;384; doi:ARTN  
610 12138710.1016/j.jhazmat.2019.121387.
- 611 7. Katsuyama C, Nakaoka S, Takeuchi Y, Tago K, Hayatsu M, Kato K.  
612 Complementary cooperation between two syntrophic bacteria in pesticide degradation.  
613 Journal of Theoretical Biology. 2009;256:4:644-54; doi:10.1016/j.jtbi.2008.10.024.
- 614 8. Yang C, Li Y, Zhang K, Wang X, Ma C, Tang H, Xu P. Atrazine degradation by a  
615 simple consortium of *Klebsiella* sp. A1 and *Comamonas* sp. A2 in nitrogen enriched  
616 medium. Biodegradation. 2010;21:1:97-105; doi:10.1007/s10532-009-9284-9.
- 617 9. Billet L, Devers M, Rouard N, Martin-Laurent F, Spor A. Labour sharing promotes  
618 coexistence in atrazine degrading bacterial communities. Sci Rep. 2019;9:1:18363;  
619 doi:10.1038/s41598-019-54978-2.



- 620 10. Gilbert ES, Walker AW, Keasling JD. A constructed microbial consortium for  
621 biodegradation of the organophosphorus insecticide parathion. *Appl Microbiol Biot.*  
622 2003;61:1:77-81; doi:10.1007/s00253-002-1203-5.
- 623 11. Meyer-Cifuentes IE, Werner J, Jehmlich N, Will SE, Neumann-Schaal M, Ozturk  
624 B. Synergistic biodegradation of aromatic-aliphatic copolyester plastic by a marine  
625 microbial consortium. *Nature Communications.* 2020;11:1; doi:ARTN  
626 579010.1038/s41467-020-19583-2.
- 627 12. Reis AC, Cvancarova M, Liu Y, Lenz M, Hettich T, Kolvenbach BA, Corvini PFX,  
628 Nunes OC. Biodegradation of sulfamethoxazole by a bacterial consortium of  
629 *Achromobacter denitrificans* PR1 and *Leucobacter* sp GP. *Appl Microbiol Biot.*  
630 2018;102:23:10299-314; doi:10.1007/s00253-018-9411-9.
- 631 13. Zheng H, Perreau J, Powell JE, Han BF, Zhang ZJ, Kwong WK, Tringe SG,  
632 Moran NA. Division of labor in honey bee gut microbiota for plant polysaccharide  
633 digestion. *P Natl Acad Sci USA.* 2019;116:51:25909-16;  
634 doi:10.1073/pnas.1916224116.
- 635 14. Peng XF, Wilken S, Lankiewicz TS, Gilmore SP, Brown JL, Henske JK, Swift CL,  
636 Salamov A, Barry K, Grigoriev IV, Theodorou MK, Valentine DL, O'Malley MA.  
637 Genomic and functional analyses of fungal and bacterial consortia that enable  
638 lignocellulose breakdown in goat gut microbiomes. *Nat Microbiol.* 2021;6:4:499-+;  
639 doi:10.1038/s41564-020-00861-0.
- 640 15. Cao X, Hamilton JJ, Venturelli OS. Understanding and Engineering Distributed  
641 Biochemical Pathways in Microbial Communities. *Biochemistry-US.*  
642 2019;58:2:94-107; doi:10.1021/acs.biochem.8b01006.
- 643 16. Koudryashova Y, Chizhova T, Tishchenko P, Hayakawa K. Seasonal Variability of  
644 Polycyclic Aromatic Hydrocarbons (PAHs) in a Coastal Marine Area in the  
645 Northwestern Region of the Sea of Japan/East Sea (Possiet Bay). *Ocean Sci J.*  
646 2019;54:4:635-55; doi:10.1007/s12601-019-0031-9.
- 647 17. Jiang Y, Hu X, Yves UJ, Zhan H, Wu Y. Status, source and health risk assessment  
648 of polycyclic aromatic hydrocarbons in street dust of an industrial city, NW China.  
649 *Ecotoxicol Environ Saf.* 2014;106:11-8; doi:10.1016/j.ecoenv.2014.04.031.

- 650 18. Ozaki N, Takamura Y, Kojima K, Kindaichi T. Loading and removal of PAHs in a  
651 wastewater treatment plant in a separated sewer system. *Water Res.* 2015;80:337-45;  
652 doi:10.1016/j.watres.2015.05.002.
- 653 19. Boethling RS, Alexander M. Effect of Concentration of Organic-Chemicals on  
654 Their Biodegradation by Natural Microbial Communities. *Appl Environ Microb.*  
655 1979;37:6:1211-6; doi:Doi 10.1128/Aem.37.6.1211-1216.1979.
- 656 20. Fernandez J, Perez M, Romero LI. Effect of substrate concentration on dry  
657 mesophilic anaerobic digestion of organic fraction of municipal solid waste  
658 (OFMSW). *Bioresource Technol.* 2008;99:14:6075-80;  
659 doi:10.1016/j.biortech.2007.12.048.
- 660 21. Zhao J, Westerholm M, Qiao W, Yin DM, Bi SJ, Jiang MM, Dong RJ. Impact of  
661 temperature and substrate concentration on degradation rates of acetate, propionate  
662 and hydrogen and their links to microbial community structure. *Bioresource Technol.*  
663 2018;256:44-52; doi:10.1016/j.biortech.2018.01.150.
- 664 22. Monod J. The Growth of Bacterial Cultures. *Annual Review of Microbiology.*  
665 1949;3:371-94; doi:DOI 10.1146/annurev.mi.03.100149.002103.
- 666 23. Peng RH, Xiong AS, Xue Y, Fu XY, Gao F, Zhao W, Tian YS, Yao QH. Microbial  
667 biodegradation of polyaromatic hydrocarbons. *Fems Microbiol Rev.*  
668 2008;32:6:927-55; doi:10.1111/j.1574-6976.2008.00127.x.
- 669 24. Park W, Jeon CO, Cadillo H, DeRito C, Madsen EL. Survival of  
670 naphthalene-degrading *Pseudomonas putida* NCIB 9816-4 in naphthalene-amended  
671 soils: toxicity of naphthalene and its metabolites. *Appl Microbiol Biot.*  
672 2004;64:3:429-35; doi:10.1007/s00253-003-1420-6.
- 673 25. Quintas C, Leyva JS, Sotoca R, Loureiro-Dias MC, Peinado JM. A model of the  
674 specific growth rate inhibition by weak acids in yeasts based on energy requirements.  
675 *Int J Food Microbiol.* 2005;100:1-3:125-30; doi:10.1016/j.ijfoodmicro.2004.10.009.
- 676 26. Pumphrey GM, Madsen EL. Naphthalene metabolism and growth inhibition by  
677 naphthalene in *Polaromonas naphthalenivorans* strain CJ2. *Microbiology (Reading).*  
678 2007;153:Pt 11:3730-8; doi:10.1099/mic.0.2007/010728-0.
- 679 27. Joesaar M, Viggor S, Heinaru E, Naanuri E, Mehike M, Leito I, Heinaru A.

- 680 Strategy of *Pseudomonas pseudoalcaligenes* C70 for effective degradation of phenol  
681 and salicylate. PLoS One. 2017;12:3:e0173180; doi:10.1371/journal.pone.0173180.
- 682 28. Graham EB, Knelman JE, Schindlbacher A, Siciliano S, Breulmann M, Yannarell  
683 A, Bemans JM, Abell G, Philippot L, Prosser J, Foulquier A, Yuste JC, Glanville HC,  
684 Jones DL, Angel F, Salminen J, Newton RJ, Burgmann H, Ingram LJ, Hamer U,  
685 Siljanen HMP, Peltoniemi K, Potthast K, Baneras L, Hartmann M, Banerjee S, Yu RQ,  
686 Nogaro G, Richter A, Koranda M, Castle SC, Goberna M, Song B, Chatterjee A,  
687 Nunes OC, Lopes AR, Cao YP, Kaisermann A, Hallin S, Strickland MS,  
688 Garcia-Pausas J, Barba J, Kang H, Isobe K, Papaspyrou S, Pastorelli R, Lagomarsino  
689 A, Lindstrom ES, Basiliko N, Nemergut DR. Microbes as Engines of Ecosystem  
690 Function: When Does Community Structure Enhance Predictions of Ecosystem  
691 Processes? Frontiers in Microbiology. 2016;7; doi:ARTN  
692 21410.3389/fmicb.2016.00214.
- 693 29. Fuhrman JA. Microbial community structure and its functional implications.  
694 Nature. 2009;459:7244:193-9; doi:10.1038/nature08058.
- 695 30. Kato S, Haruta S, Cui ZJ, Ishii M, Igarashi Y. Stable coexistence of five bacterial  
696 strains as a cellulose-degrading community. Appl Environ Microb.  
697 2005;71:11:7099-106; doi:10.1128/Aem.71.11.7099-7106.2005.
- 698 31. Heinrich R, Schuster S. The regulation of cellular systems. Springer Science &  
699 Business Media; 2012.
- 700 32. Wegner A, Meiser J, Weindl D, Hiller K. How metabolites modulate metabolic  
701 flux. Curr Opin Biotech. 2015;34:16-22; doi:10.1016/j.copbio.2014.11.008.
- 702 33. Lanfranconi MP, Christie-Oleza JA, Martin-Cardona C, Suarez-Suarez LY,  
703 Lalucat J, Nogales B, Bosch R. Physiological role of NahW, the additional salicylate  
704 hydroxylase found in *Pseudomonas stutzeri* AN10. Fems Microbiol Lett.  
705 2009;300:2:265-72; doi:10.1111/j.1574-6968.2009.01787.x.
- 706 34. Nadell CD, Drescher K, Foster KR. Spatial structure, cooperation and competition  
707 in biofilms. Nat Rev Microbiol. 2016;14:9:589-600; doi:10.1038/nrmicro.2016.84.
- 708 35. Mitri S, Xavier JB, Foster KR. Social evolution in multispecies biofilms. P Natl  
709 Acad Sci USA. 2011;108:10839-46; doi:10.1073/pnas.1100292108.

- 710 36. Xavier JB, Foster KR. Cooperation and conflict in microbial biofilms. P Natl Acad  
711 Sci USA. 2007;104:3:876-81; doi:10.1073/pnas.0607651104.
- 712 37. Pande S, Kaftan F, Lang S, Svatos A, Germerodt S, Kost C. Privatization of  
713 cooperative benefits stabilizes mutualistic cross-feeding interactions in spatially  
714 structured environments. ISME J. 2016;10:6:1413-23; doi:10.1038/ismej.2015.212.
- 715 38. Nadell CD, Drescher K, Foster KR. Spatial structure, cooperation and competition  
716 in biofilms. Nat Rev Microbiol. 2016;14:9:589-600; doi:10.1038/nrmicro.2016.84.
- 717 39. Goldschmidt F, Regoes RR, Johnson DR. Successive range expansion promotes  
718 diversity and accelerates evolution in spatially structured microbial populations. Isme  
719 Journal. 2017;11:9:2112-23; doi:10.1038/ismej.2017.76.
- 720 40. Momeni B, Waite AJ, Shou W. Spatial self-organization favors heterotypic  
721 cooperation over cheating. Elife. 2013;2:e00960; doi:10.7554/eLife.00960.
- 722 41. Nadell CD, Foster KR, Xavier JB. Emergence of Spatial Structure in Cell Groups  
723 and the Evolution of Cooperation. Plos Computational Biology. 2010;6:3; doi:ARTN  
724 e100071610.1371/journal.pcbi.1000716.
- 725 42. Klausen M, Heydorn A, Ragas P, Lambertsen L, Aaes-Jorgensen A, Molin S,  
726 Tolker-Nielsen T. Biofilm formation by *Pseudomonas aeruginosa* wild type, flagella  
727 and type IV pili mutants. Mol Microbiol. 2003;48:6:1511-24;  
728 doi:10.1046/j.1365-2958.2003.03525.x.
- 729 43. Barken KB, Pamp SJ, Yang L, Gjermansen M, Bertrand JJ, Klausen M, Givskov  
730 M, Whitchurch CB, Engel JN, Tolker-Nielsen T. Roles of type IV pili,  
731 flagellum-mediated motility and extracellular DNA in the formation of mature  
732 multicellular structures in *Pseudomonas aeruginosa* biofilms. Environ Microbiol.  
733 2008;10:9:2331-43; doi:10.1111/j.1462-2920.2008.01658.x.
- 734 44. O'Toole GA, Kolter R. Flagellar and twitching motility are necessary for  
735 *Pseudomonas aeruginosa* biofilm development. Mol Microbiol. 1998;30:2:295-304;  
736 doi:10.1046/j.1365-2958.1998.01062.x.
- 737 45. Hallatschek O, Hersen P, Ramanathan S, Nelson DR. Genetic drift at expanding  
738 frontiers promotes gene segregation. P Natl Acad Sci USA. 2007;104:50:19926-30;  
739 doi:10.1073/pnas.0710150104.

- 740 46. Hallatschek O, Nelson DR. Life at the Front of an Expanding Population.  
741 Evolution. 2010;64:1:193-206; doi:10.1111/j.1558-5646.2009.00809.x.
- 742 47. Korolev KS, Xavier JB, Nelson DR, Foster KR. A Quantitative Test of Population  
743 Genetics Using Spatiogenetic Patterns in Bacterial Colonies. American Naturalist.  
744 2011;178:4:538-52; doi:10.1086/661897.
- 745 48. Mitri S, Clarke E, Foster KR. Resource limitation drives spatial organization in  
746 microbial groups. Isme Journal. 2016;10:6:1471-82; doi:10.1038/ismej.2015.208.
- 747 49. Li Z, Yoshida N, Wang A, Nan J, Liang B, Zhang C, Zhang D, Suzuki D, Zhou X,  
748 Xiao Z, Katayama A. Anaerobic mineralization of 2,4,6-tribromophenol to CO<sub>2</sub> by a  
749 synthetic microbial community comprising *Clostridium*, *Dehalobacter*, and  
750 *Desulfatiglans*. Bioresour Technol. 2015;176:225-32;  
751 doi:10.1016/j.biortech.2014.10.097.
- 752 50. Che S, Men Y. Synthetic microbial consortia for biosynthesis and biodegradation:  
753 promises and challenges. J Ind Microbiol Biotechnol. 2019;46:9-10:1343-58;  
754 doi:10.1007/s10295-019-02211-4.
- 755 51. Hudcova T, Halecky M, Kozliak E, Stiborova M, Paca J. Aerobic degradation of  
756 2,4-dinitrotoluene by individual bacterial strains and defined mixed population in  
757 submerged cultures. J Hazard Mater. 2011;192:2:605-13;  
758 doi:10.1016/j.jhazmat.2011.05.061.
- 759 52. Roell GW, Zha J, Carr RR, Koffas MA, Fong SS, Tang YJ. Engineering microbial  
760 consortia by division of labor. Microb Cell Fact. 2019;18:1:35;  
761 doi:10.1186/s12934-019-1083-3.
- 762 53. Jia XQ, He Y, Jiang DW, Liu C, Lu WY. Construction and analysis of an  
763 engineered *Escherichia coli*-*Pseudomonas aeruginosa* co-culture consortium for  
764 phenanthrene bioremoval. Biochem Eng J. 2019;148:214-23;  
765 doi:10.1016/j.bej.2019.05.010.
- 766 54. Momeni B, Briley KA, Fields MW, Shou WY. Strong inter-population  
767 cooperation leads to partner intermixing in microbial communities. Elife. 2013;2;  
768 doi:ARTN e0023010.7554/eLife.00230.
- 769 55. Frost I, Smith WPJ, Mitri S, Millan AS, Davit Y, Osborne JM, Pitt-Francis JM,

- 770 MacLean RC, Foster KR. Cooperation, competition and antibiotic resistance in  
771 bacterial colonies. *ISME J.* 2018;12:6:1582-93; doi:10.1038/s41396-018-0090-4.
- 772 56. Kerr B, Riley MA, Feldman MW, Bohannan BJ. Local dispersal promotes  
773 biodiversity in a real-life game of rock-paper-scissors. *Nature.* 2002;418:6894:171-4;  
774 doi:10.1038/nature00823.
- 775 57. Nahum JR, Harding BN, Kerr B. Evolution of restraint in a structured  
776 rock-paper-scissors community. *P Natl Acad Sci USA.* 2011;108:10831-8;  
777 doi:10.1073/pnas.1100296108.
- 778 58. Wang M, Liu X, Nie Y, Wu XL. Selfishness driving reductive evolution shapes  
779 interdependent patterns in spatially structured microbial communities. *ISME J.*  
780 2021;15:5:1387-401; doi:10.1038/s41396-020-00858-x.
- 781 59. Tecon R, Or D. Cooperation in carbon source degradation shapes spatial  
782 self-organization of microbial consortia on hydrated surfaces. *Sci Rep-Uk.* 2017;7;  
783 doi:ARTN 4372610.1038/srep43726.
- 784 60. Goldschmidt F, Regoes RR, Johnson DR. Metabolite toxicity slows local diversity  
785 loss during expansion of a microbial cross-feeding community. *Isme Journal.*  
786 2018;12:1:136-44; doi:10.1038/ismej.2017.147.
- 787 61. Hellweger FL, Clegg RJ, Clark JR, Plugge CM, Kreft JU. Advancing microbial  
788 sciences by individual-based modelling. *Nat Rev Microbiol.* 2016;14:7:461-71;  
789 doi:10.1038/nrmicro.2016.62.
- 790 62. Gutierrez M, Gregorio-Godoy P, Perez Del Pulgar G, Munoz LE, Saez S,  
791 Rodriguez-Paton A. A New Improved and Extended Version of the Multicell Bacterial  
792 Simulator gro. *ACS Synth Biol.* 2017;6:8:1496-508; doi:10.1021/acssynbio.7b00003.
- 793 63. Brunet-Galmes I, Busquets A, Pena A, Gomila M, Nogales B, Garcia-Valdes E,  
794 Lalucat J, Bennasar A, Bosch R. Complete Genome Sequence of the  
795 Naphthalene-Degrading Bacterium *Pseudomonas stutzeri* AN10 (CCUG 29243). *J*  
796 *Bacteriol.* 2012;194:23:6642-3; doi:10.1128/Jb.01753-12.
- 797

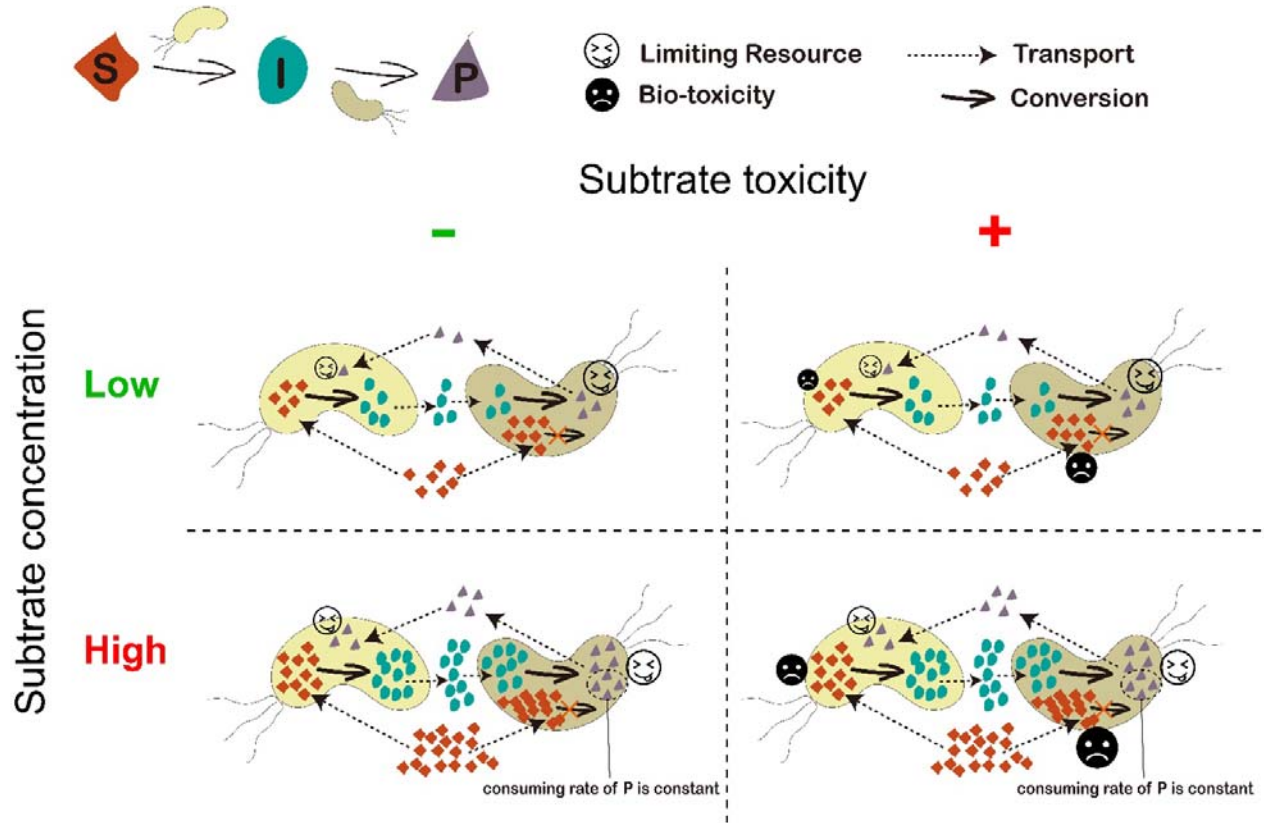

800 **Figure 1** Hypothesis for how substrate concentration and toxicity govern the structure of community engaged in MDOL. In a community



801 degrading an organic compound through metabolic division of labor (MDOL), final product was assumed to be the sole resource and was  
802 synthesized by the strain performing the second step. Therefore, this strain will obtain more nutrients (denoted as bigger ‘smiling face’), while  
803 the other strain has to collect product released from this population (denoted as smaller ‘smiling face’). Thus, the last population was named  
804 ‘Embezzler’. However, increasing the concentration of the substrate (vertical axis) improves the flux of the pathway. Since the P consuming  
805 ability of Embezzler cells is limited (dashed box), increasing the concentration will lead to higher final product leakiness, favoring the growth of  
806 the first population. Moreover, introducing substrate biotoxicity (horizontal axis) also favors the first population, because it converts this toxic  
807 substrate (denoted as smaller sad face), resulting in lower intracellular substrate concentration compared to that of the Embezzler cells (denoted  
808 as bigger sad face). Thus, the first population was named ‘Detoxifier’.



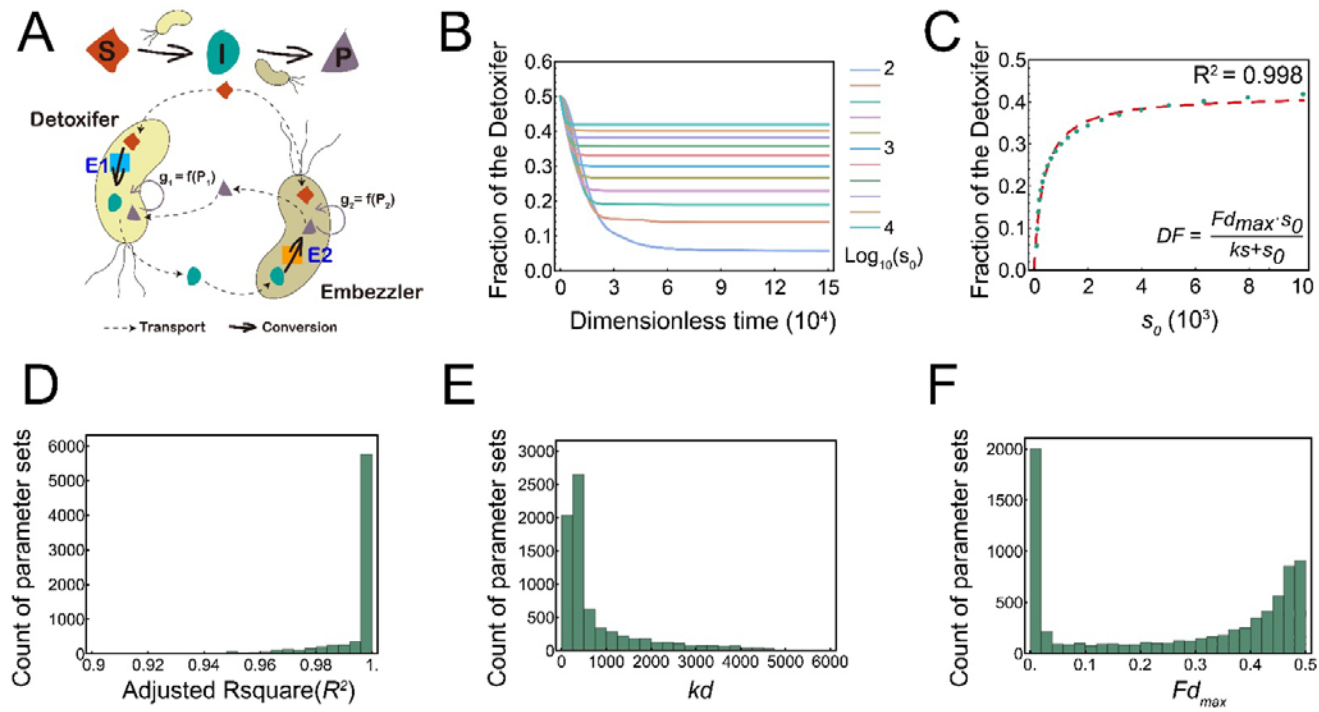

809

810 **Figure 2** Simulation of the ordinary differential equation (ODE) model excluding substrate toxicity. (A) Schematic diagram showing the basic  
 811 assumptions of our ODE model without including substrate toxicity. (B-C) A representative case shows how substrate concentration affects the  
 812 structure of a MDOL community. The simulation dynamics of the fraction of Detoxifier population with the conditions of different initial  
 813 substrate concentrations are shown in (B). The relationship between substrate concentration and steady-state fraction of Detoxifier is shown in (C).

814 In (C), the green dots denote the simulated steady-state fraction of Detoxifier, and the red dashed line shows the plot of the best fitting function  
815 using Eqn. [1]. Parameter values used in these simulations:  $y = 10^{-4}$ ,  $Cp = 10$ ,  $bg = 1$ ,  $a_1 = 10000$ ,  $a_2 = 1000$ ,  $\beta_2 = 1$ ,  $\gamma_s = 1$ ,  $\gamma_i = 1$ ,  $\gamma_p = 1$ ,  $\rho = 10^{-2}$ .  
816 The best fitting value of  $ks$  in this case is 35.3, and that of  $Fd_{max}$  is 0.417. (D-F) Distributions of Adjusted  $R^2$  (D) of the fitting functions, best  
817 fitting value of  $ks$  (E) and  $Fd_{max}$  (F) in the second-round simulations that does not include substrate toxicity, using 7776 parameter value  
818 combinations of the five key parameters ( $a_1$ ,  $\gamma_s$ ,  $\gamma_i$ ,  $\gamma_p$ , and  $Cp$ ).

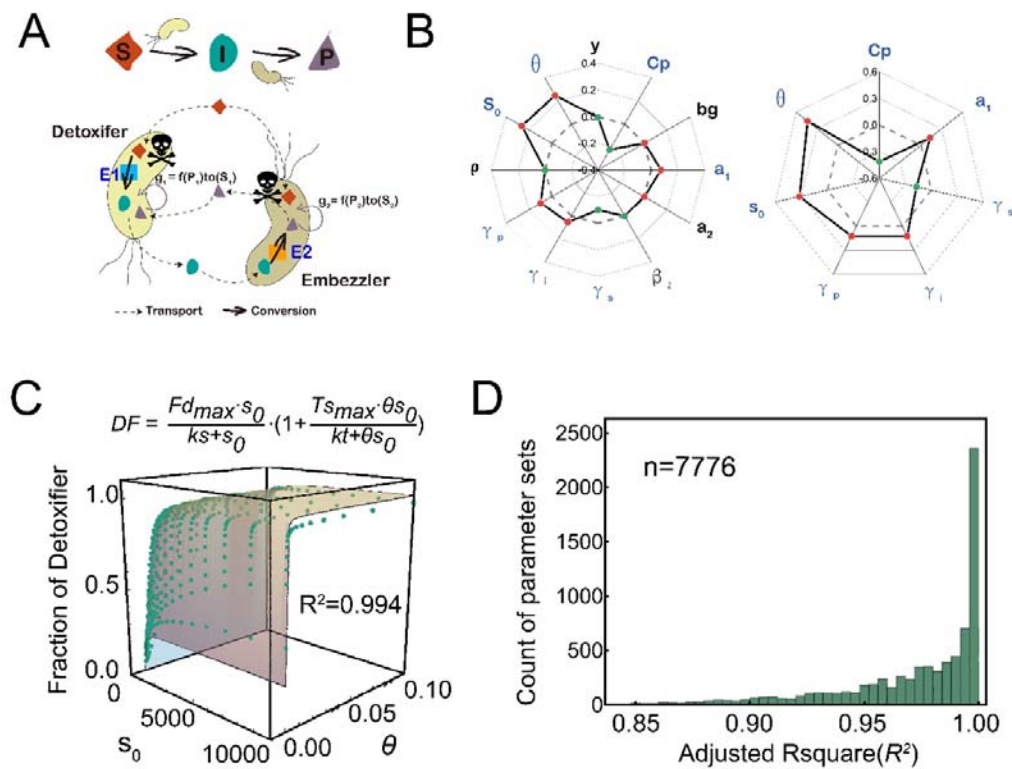

819

820 **Figure 3** Simulation of the ordinary differential equation (ODE) model that includes  
 821 substrate toxicity, suggesting that both substrate concentration and its toxicity  
 822 collectively affect the structure of a community engaged in MDOL. (A) Schematic  
 823 diagram showing the basic assumptions of our ODE model that includes substrate  
 824 toxicity. (B) Multiple linear regression analysis of the simulation results of the ODE  
 825 model showed how the parameters included in the model affect the structure of the  
 826 MDOL community. Left: results from the first-round simulations that considered all  
 827 the twelve parameters are shown. Blue font denotes the identified key parameters.  
 828 Right: results from the second-round simulations that only considered the seven key  
 829 parameters. The axis of the radar plot denotes the values of fitting coefficients of the  
 830 parameters from multiple linear regression analyses. Red dots denote the steady-state

831 fraction of Detoxifier is positively correlated with corresponding parameter, while the  
832 green dots represent the negative correlation. The origin axis (0) is highlighted by  
833 dash line to emphasize the fact that the closer a value is to zero, the smaller the effect  
834 on the community structure by the corresponding parameter. The data are also listed  
835 in Supplementary Table 4 and Supplementary Table 5. In this analysis, the toxic  
836 effects of substrate on population growth were assumed to follow a reciprocal  
837 relationship. Results considering other relationships are shown in Supplementary  
838 Figure 3. (C) A representative case shows how both substrate concentration and its  
839 toxicity collectively affect the steady-state proportion of Detoxifier cells. The green  
840 dots denote the simulated steady-state fraction of Detoxifier, and the surface shows the  
841 plot of the best fitting function using Eqn. [2]. Parameter values used in these  
842 simulations:  $y = 10^{-4}$ ,  $Cp = 10$ ,  $bg = 1$ ,  $a_1 = 10000$ ,  $a_2 = 1000$ ,  $\beta_2 = 1$ ,  $\gamma_s = 1$ ,  $\gamma_i = 1$ ,  $\gamma_p$   
843  $= 1$ ,  $\rho = 10^{-2}$ . The best fitting value of  $ks$ ,  $Fd_{max}$ ,  $kt$ , and  $TS_{max}$  in this case are 48.9,  
844 0.423, 0.848, 3.39, respectively. (D) Distributions of Adjusted  $R^2$  of the fitting  
845 functions in the second-round simulations that includes substrate toxicity, using 7776  
846 parameter value combinations of the five key parameters ( $a_1$ ,  $\gamma_s$ ,  $\gamma_i$ ,  $\gamma_p$ , and  $Cp$ ).  
847

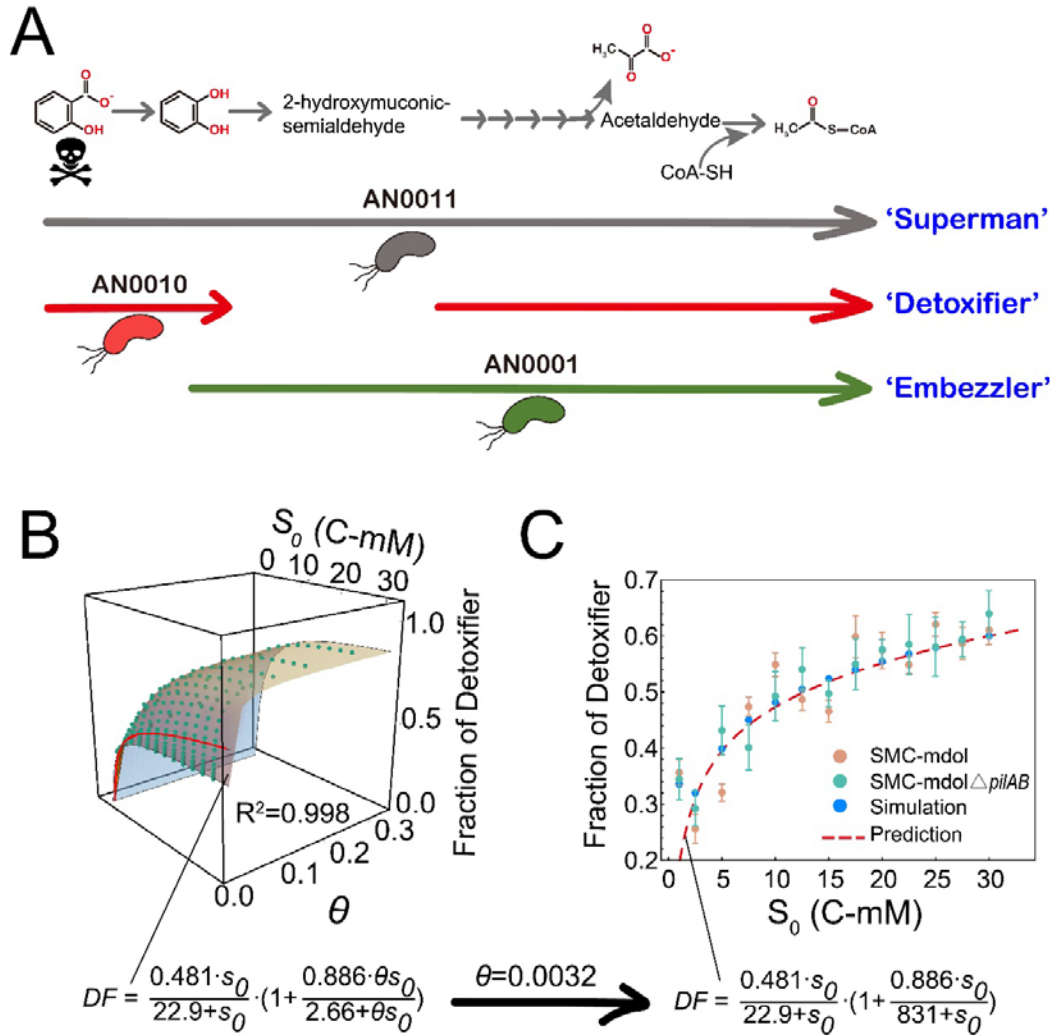

848

849 **Figure 4** Structure of SMC-mdol in a spatially unstructured system governed by

850 different substrate traits. (A) Design of the SMC-mdol. Shown are the pathway of

851 salicylate degradation in ‘Superman’ strain *P. stutzeri* AN0011, as well as partial

852 pathways carried out by Detoxifier strain AN0010 and Embezzler strain AN0001.

853 Skull marks that salicylate is toxic. (B) Predicting the structure of the synthetic

854 consortium using our ODE model, as well as the derived predictive function using

855 Eqn. [2]. The relationship between the steady-state fraction of the Detoxifier

856 population and substrate concentration ( $s_0$ ), as well as substrate toxic strength ( $\theta$ ), was

857 built from our mathematical model using parameters consistent with our

858 experiemental system. Each green dot shows the steady-state fraction of Detoxifier  
859 obtained by one simulation associated with the specific parameter set. The surface  
860 diagram shows distribution of the steady-state fraction of Detoxifier predicted by our  
861 proposed simple formula. The Red line in the surface denotes the scenarios  $\theta=0.0032$ ,  
862 which is the toxic strength of salicylate obtained from experiemental measurements.  
863 (C) The experimental measured steady-state fractions of Detoxifier in cultures with  
864 different salicylate concentrations is consistent with those from mathematical  
865 predictions. Note that in the plots, substrate concentrations are shown in dimentional  
866 form ( $S_0$ , Cmmol/L), but in the predictive functions, the fitting analysis was  
867 performed using its dimensionless form ( $s_0$ ).  
868

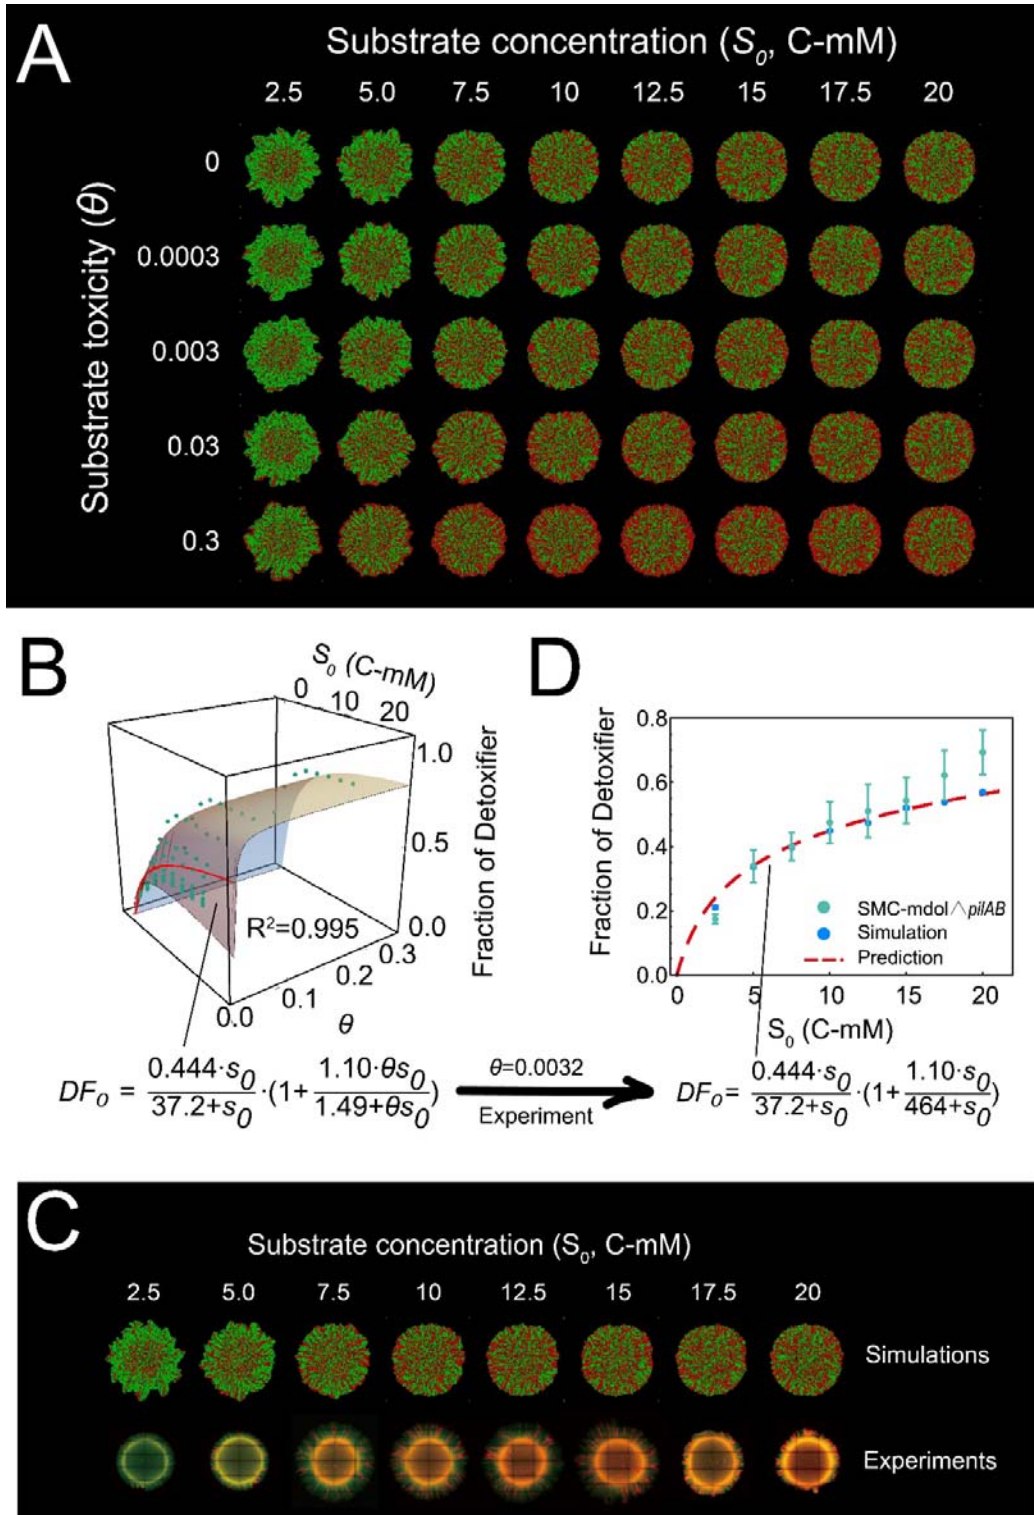

869

870 **Figure 5** Substrate traits governing the structure of a microbial community engaged in

871 metabolic division of labor (MDOL) in a spatially structured environment. (A)

872 Representative colony patterns from Individual-based (IB) modelling initialized with

873 different substrate traits. Detoxifier cells are shown in red, while Embezzler cells are  
874 shown in green. (B) Analysis of community composition in the expanding region of  
875 the colonies from IB simulations across eight kinds of initial substrate concentrations  
876 and five different toxic strength. Plot shows how both substrate concentration and its  
877 toxicity collectively affect the steady-state proportion of Detoxifier. The green dots  
878 denote the simulated steady-state fraction of Detoxifier. The surface shows the plot of  
879 the best fitting function using Eqn. [2]. The Red line in the surface denotes the  
880 scenarios  $\theta=0.0032$ , which is the toxic strength of salicylate obtained from  
881 experimental measurements. (C) Representative colony patterns from the pattern  
882 formation assays of *SMC-mdol $\Delta$ pilAB*, as well as the IB simulations using the  
883 parameters matched with our synthetic system (Supplementary Table 7), across eight  
884 different initial substrate concentrations. (D) The experimental measured steady-state  
885 fractions of Detoxifier in the expanding region of these colonies is consistent with  
886 those from mathematical predictions. Note that in the plots, substrate concentrations  
887 are shown in dimensional form ( $S_0$ , Cmmol/L), but in the predictive functions, the  
888 fitting analyses were performed using its dimensionless form ( $s_0$ ).  
889



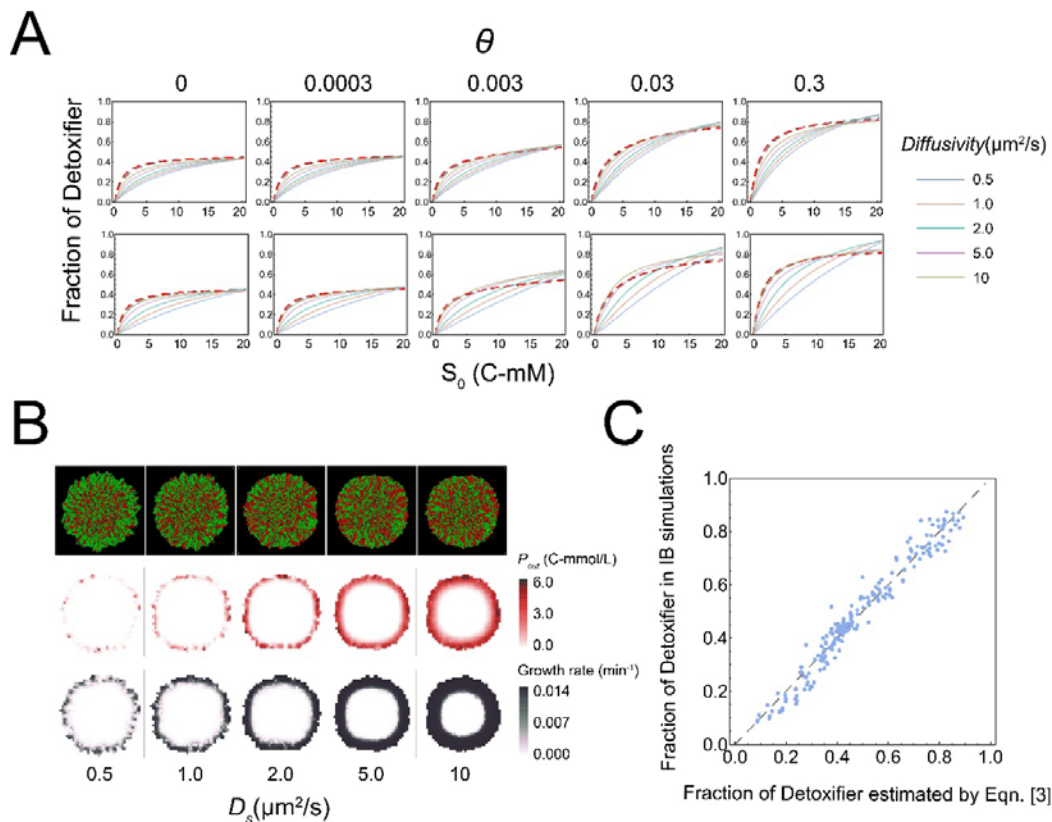

890

891 **Figure 6** The effects of the diffusion level of substrate, intermediate and product on

892 the structure of MDOL community. (A) The relationship between initial substrate

893 concentration ( $S_0$ ) with the steady-state proportion of Detoxifier cells in the expanding

894 region of the colonies, across different substance diffusion level (denoted by different

895 curve colors) and different strength of substrate toxicity ( $\theta$ , denoted by five

896 subgraphs). First row: diffusion levels of S, I and P (that is  $D_s$ ,  $D_i$ , and  $D_p$ ) were set to

897 be identical and simultaneously modulated in the simulations. Second row: Diffusion

898 levels of I and P ( $D_i$  and  $D_p$ ) were set as default values shown in Supplementary Table

899 7, while diffusion levels of S were solely modulated. Other parameters in these

900 simulations were initialized with the default values shown in Supplementary Table 7.

901 The simulation data were then fitted to Eqn. [2] to obtain the curves shown in the plot.

902 The Adjust  $R^2$  values for these fitting analyses range from 0.994 to 0.997. (B)  
903 Diffusion levels of substrate affected the thickness of cell ‘active layer’.  
904 Representative colony images (first row), the corresponding distributions of final  
905 product (second row), as well as the distributions of cell growth rates (third row) in  
906 the 2D plane at steady-state, obtained from individual-based simulations initialized  
907 with different diffusion level of substrate. Shown are the results in which  $S_0$  was set to  
908 10 C-mol/L and  $\theta$  was 0 (not include substrate toxicity). In the colony images,  
909 Detoxifier cells are shown in red, while Embezzler cells are shown in green.  
910 Thickness of cell ‘active layer’ is reflected by thickness of the cell layer that  
911 possessing positive growth rate (third row). (C) The linear correlation between the  
912 steady-state frequencies of Detoxifier predicted by Eqn. [4] and those frequencies  
913 obtained by our Individual-based simulations. The dashed line shows the linear curve  
914 in which the predicting results is completely identical to simulated results. The best  
915 fitting value of  $ks$ ,  $Fd_{max}$ ,  $kt$ ,  $TS_{max}$ ,  $kd_1$ , and  $kd_2$  in this case are 30.8, 0.446, 1.46, 1.05,  
916 14000, and 44.8 respectively.
